# Supplementary figures and images for: Turkestan Cockroaches Avoid Entering a Static Electric Field upon Perceiving an Attractive Force Applied to Antennae Inserted into the Field
Source: MDPI journal article supplement (doi:10.3390/insects12070621), 2021-07-08

**Figure S1**

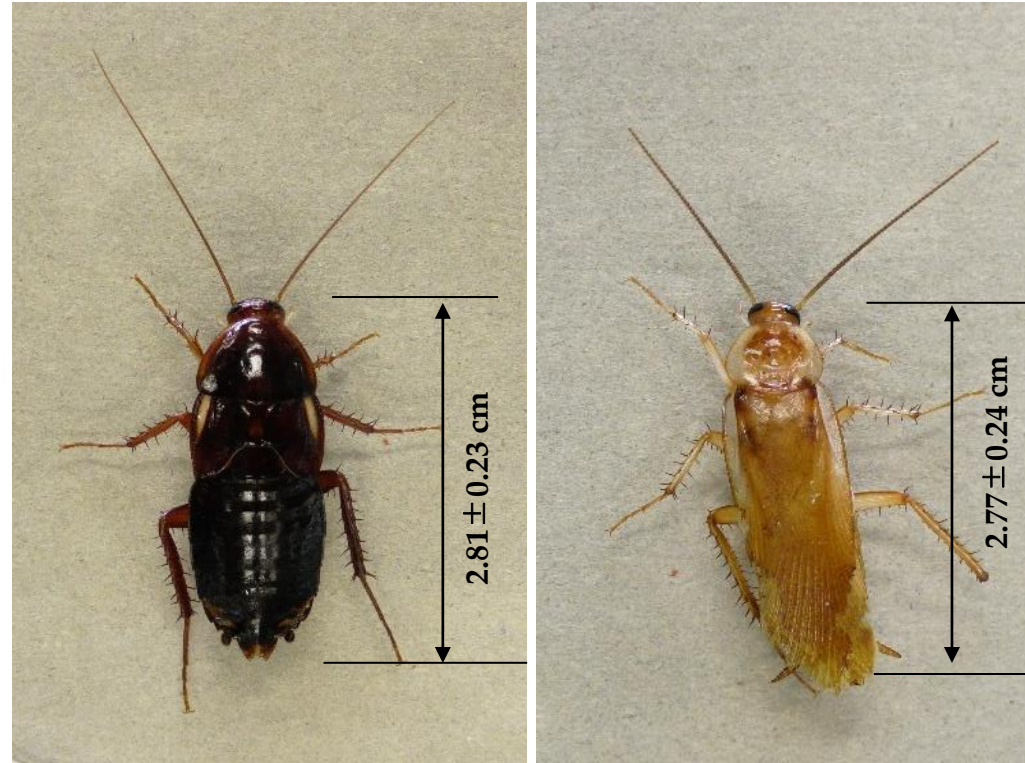

**Figure S1.** Adult female (left) and male (right) Turkestan cockroaches used in this study.

Supplement: s1 [file s1]
